# Supplementary material for: Regulation of Miwi-mediated mRNA stabilization by Ck137956/Tssa is essential for male fertility
Source: Springer Nature journal article supplement (doi:10.1186/s12915-023-01589-z), 2023-04-17

**Fig 1A**

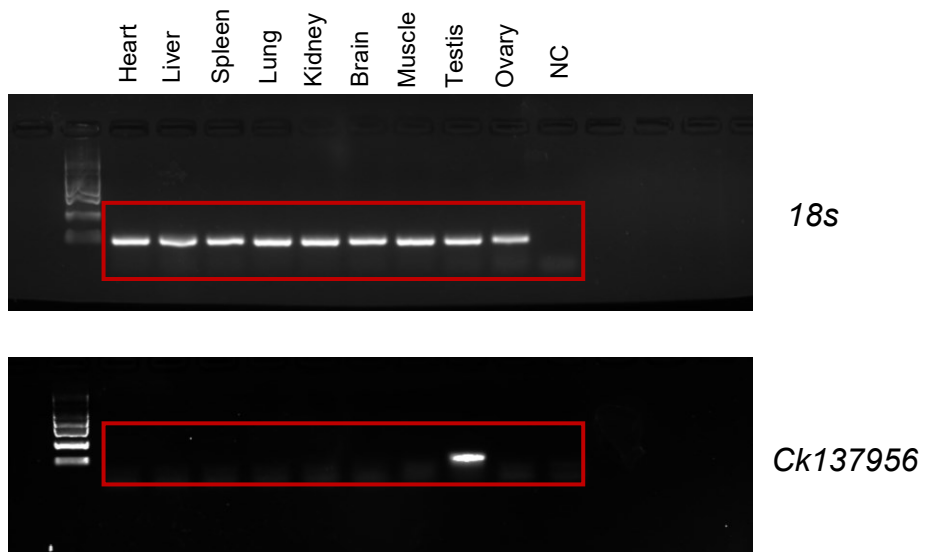

**Fig 1C**

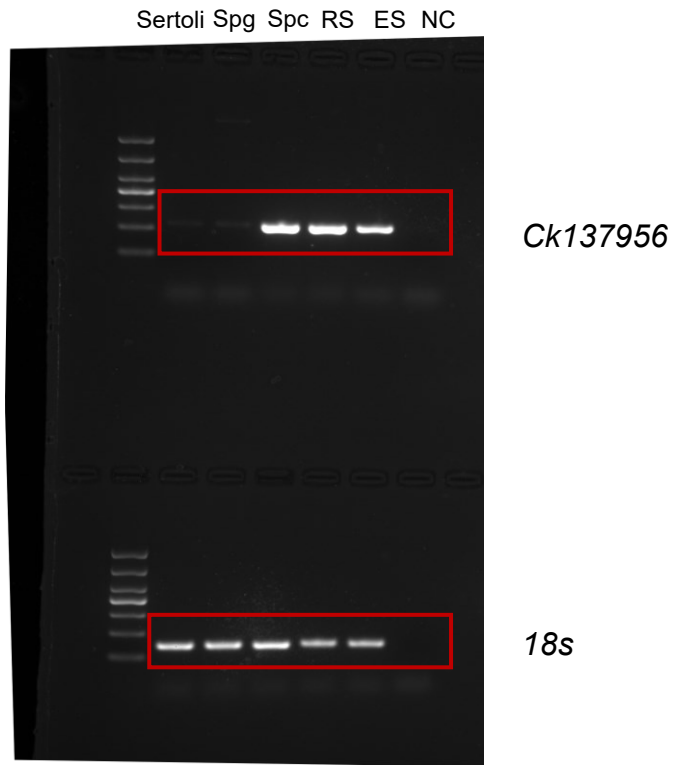

**Fig 1H**

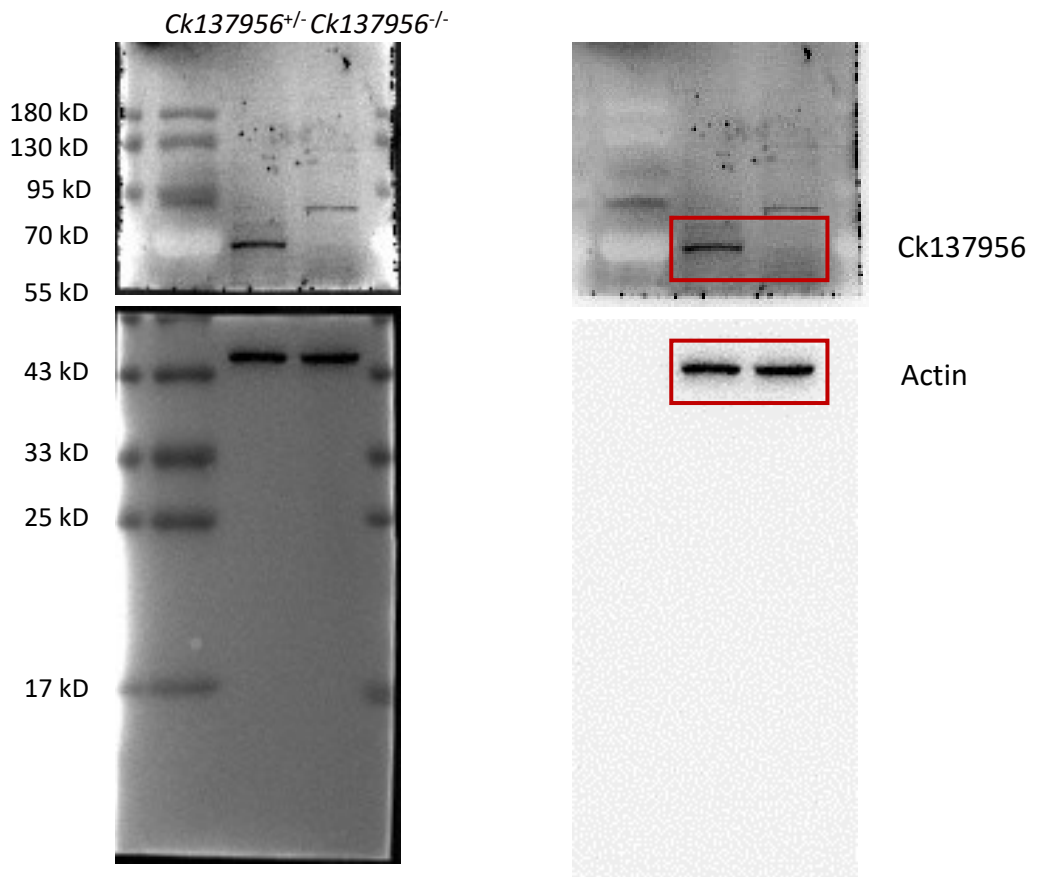

**Fig 3G**

Cytoplasm  
Nuclei  
Chromatin

180 kD  
130 kD  
95 kD  
70 kD  
55 kD

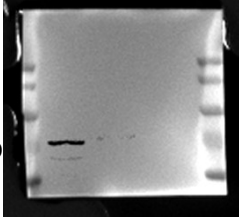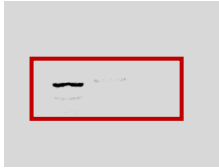

Ck137956

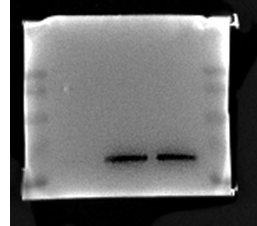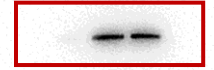

Hdac1

43 kD  
33 kD  
25 kD

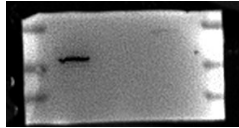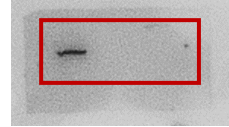

Gapdh

10 kD

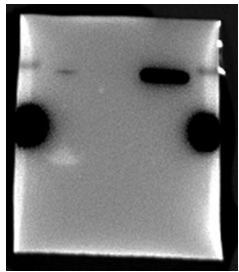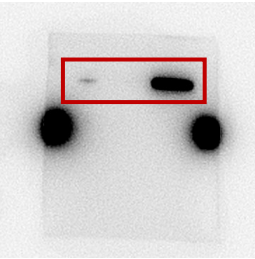

H4

**Fig 4A**

HA-Ck137956 + - +  
Flag-Miwi - + +

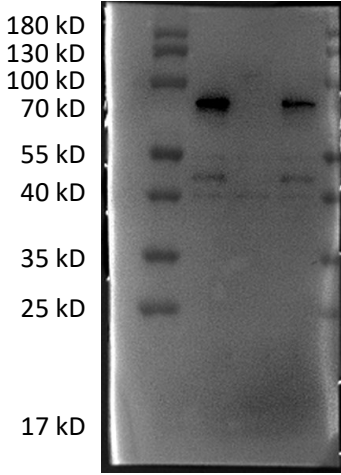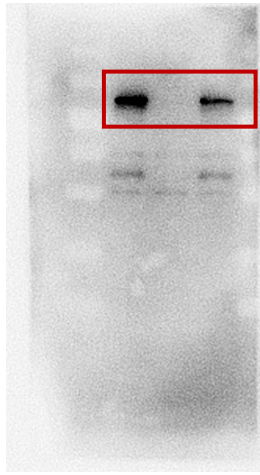

Input HA

HA-Ck137956 + - +  
Flag-Miwi - + +

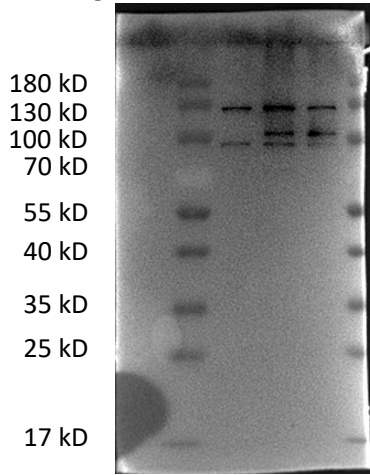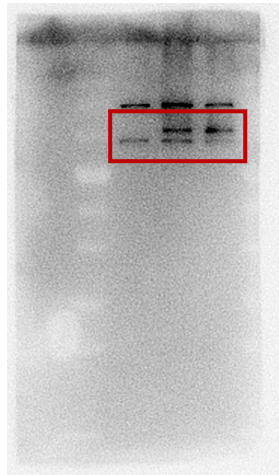

Input Flag

HA-Ck137956 + - +  
Flag-Miwi - + +

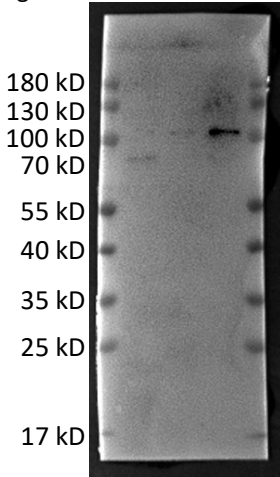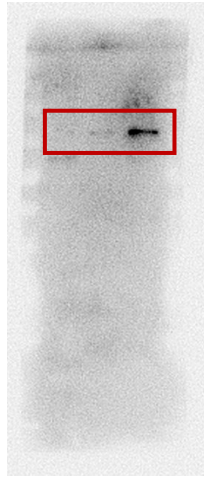

IP:HA IB:Flag

HA-Ck137956 + - +  
Flag-Miwi - + +

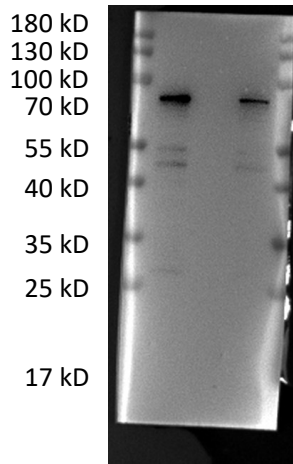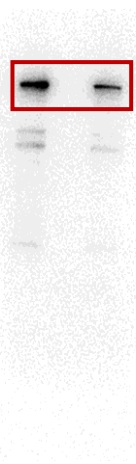

IP:HA IB:HA

HA-Ck137956 + - +  
Flag-Miwi - + +

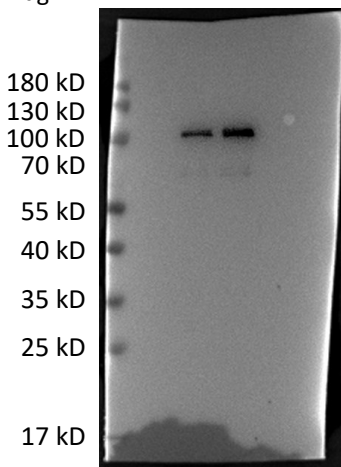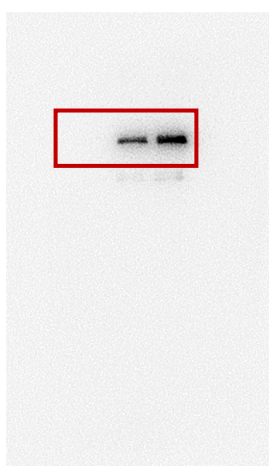

IP:Flag IB:Flag

HA-Ck137956 + - +  
Flag-Miwi - + +

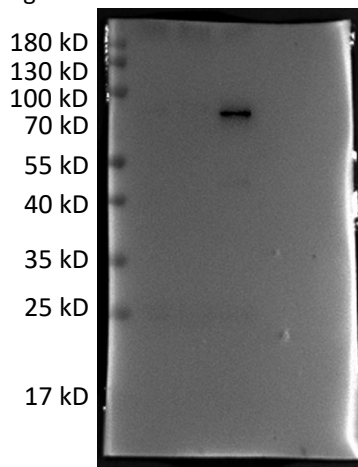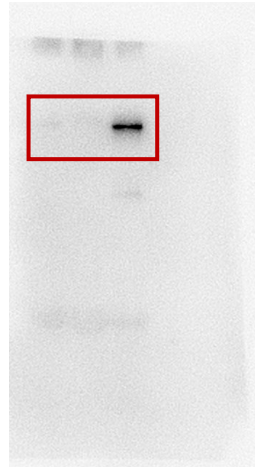

IP:Flag IB:HA

Fig 4B

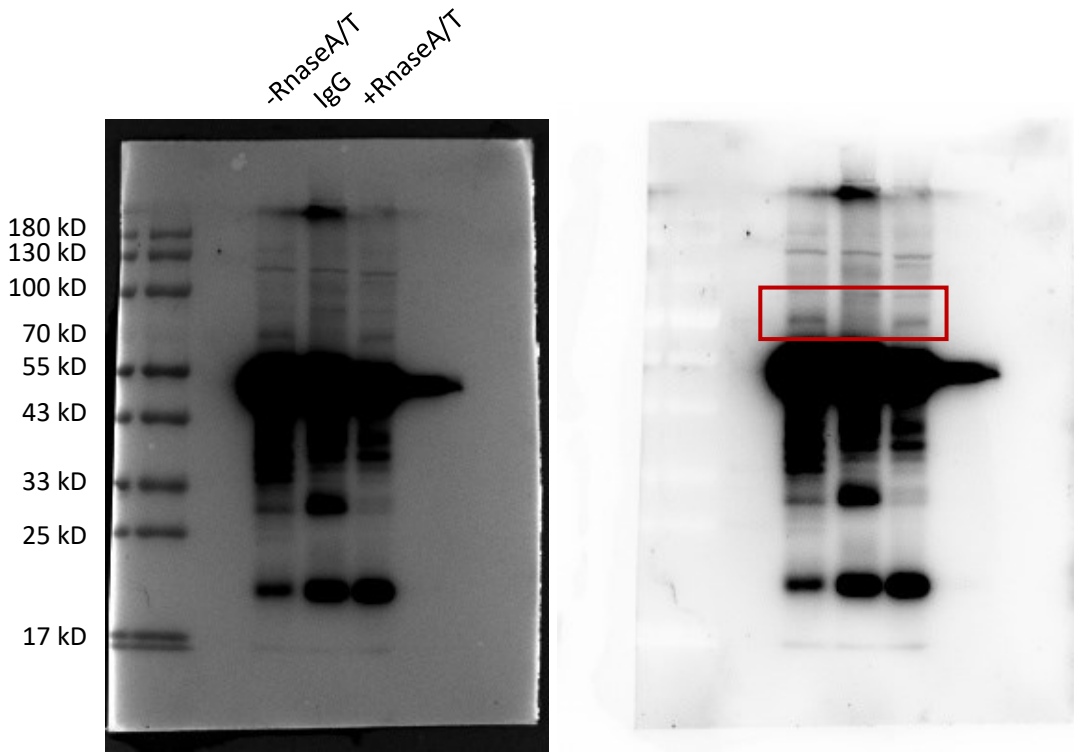

IP: Miwi IB: Ck137956

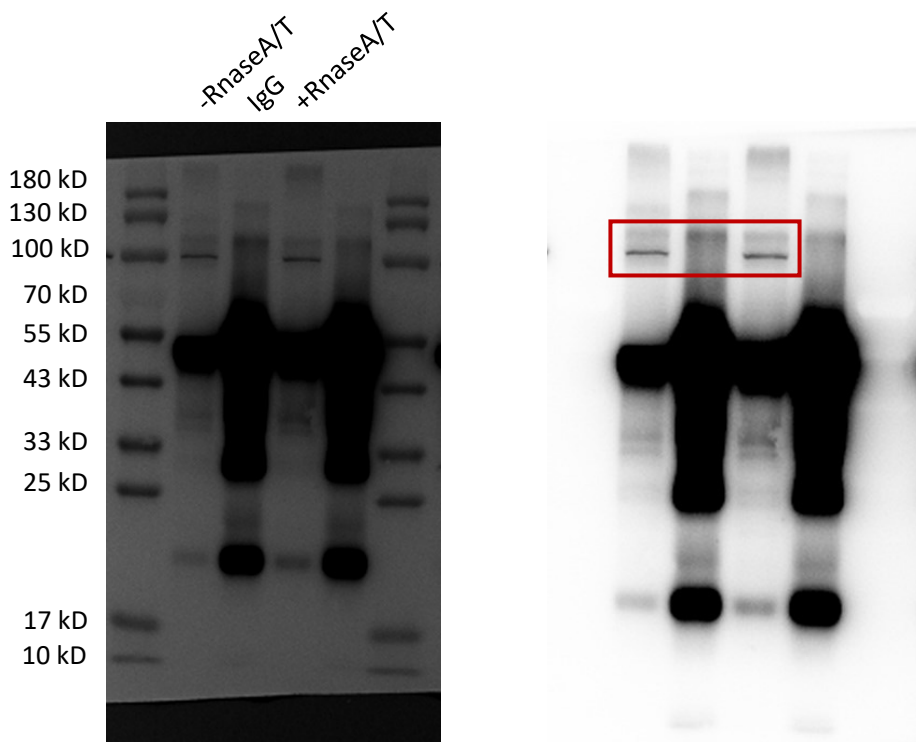

IP: Ck137956 IB: Miwi



**Fig 4C**

Flag-Miwi: FL FL FL FL FL N ΔN C - FL  
HA-Ck137956: FL N1 N2 C1 C2 FL FL FL FL -

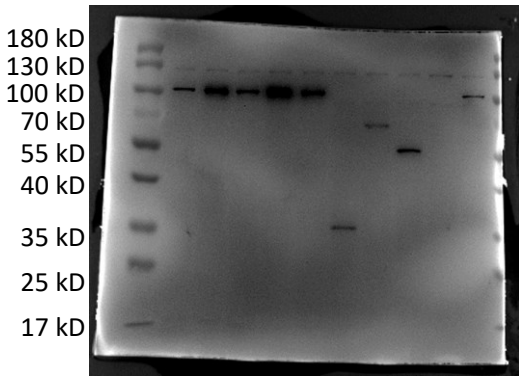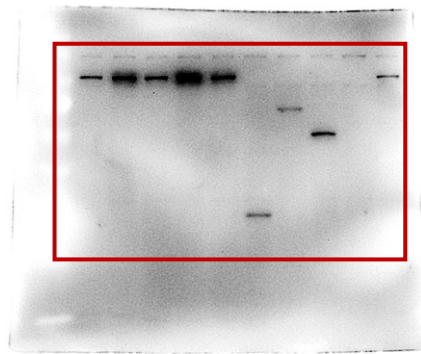

Input: Flag

Flag-Miwi: FL FL FL FL FL N ΔN C - FL  
HA-Ck137956: FL N1 N2 C1 C2 FL FL FL FL -

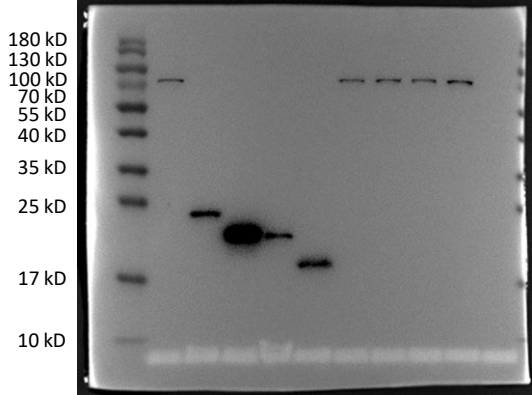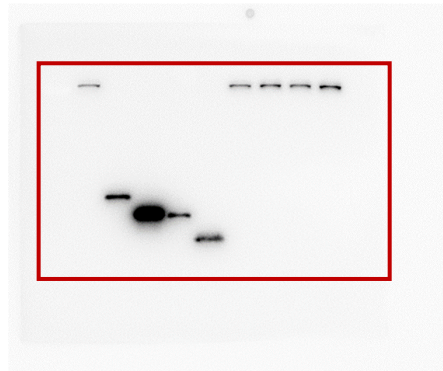

Input: HA

Flag-Miwi: FL FL FL FL FL N ΔN C - FL  
HA-Ck137956: FL N1 N2 C1 C2 FL FL FL FL -

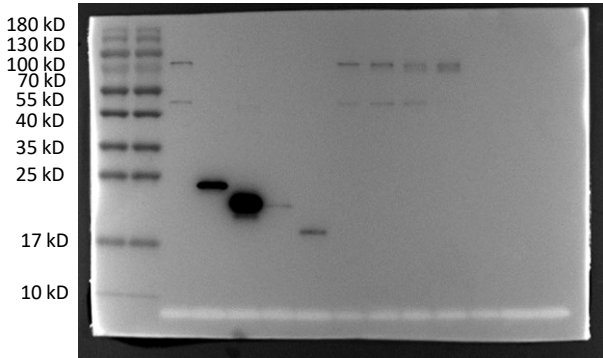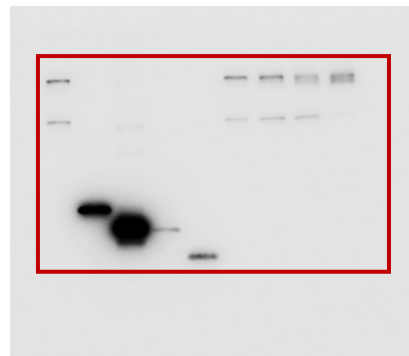

IP: HA IB: HA

Flag-Miwi: FL FL FL FL FL N ΔN C - FL  
HA-Ck137956: FL N1 N2 C1 C2 FL FL FL FL -

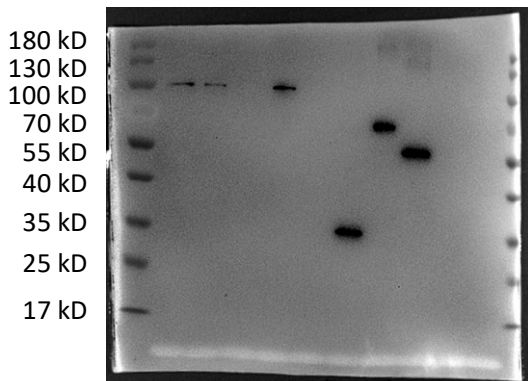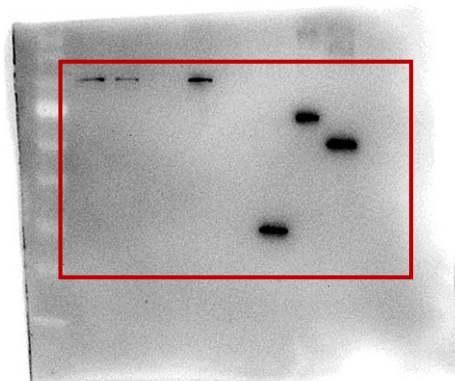

IP: HA IB: Flag

**Fig 4D**

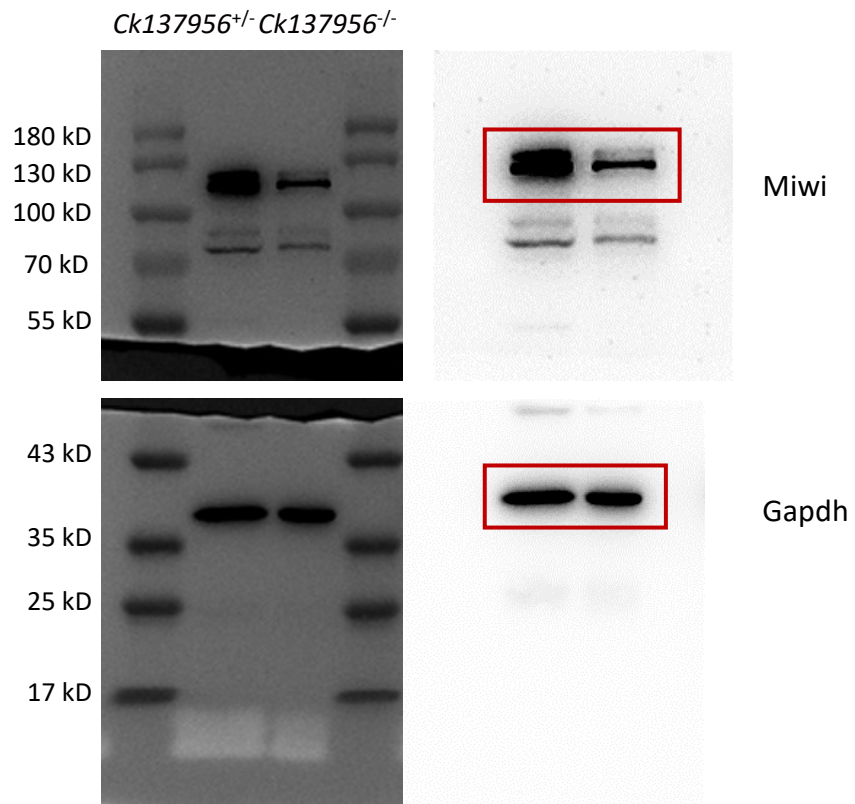



Fig 4F

|              |   |   |   |
|--------------|---|---|---|
| MG132        | + | + | + |
| HA-ubiquitin | + | + | - |
| V5-Ck1379156 | + | - | - |
| Flag-Miwi    | + | + | - |

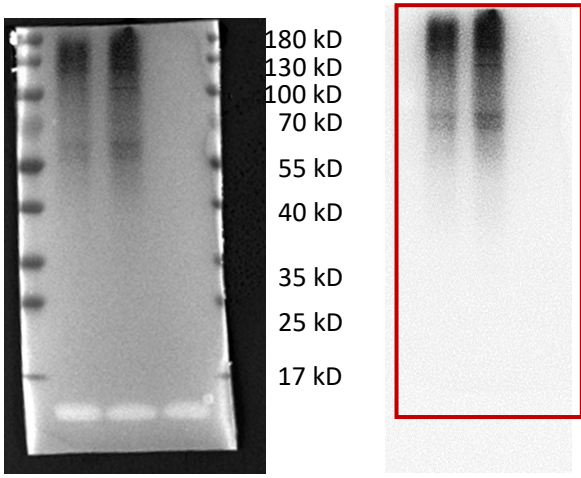

IP: Flag IB: HA

|              |   |   |   |
|--------------|---|---|---|
| MG132        | + | + | + |
| HA-ubiquitin | + | + | - |
| V5-Ck1379156 | + | - | - |
| Flag-Miwi    | + | + | - |

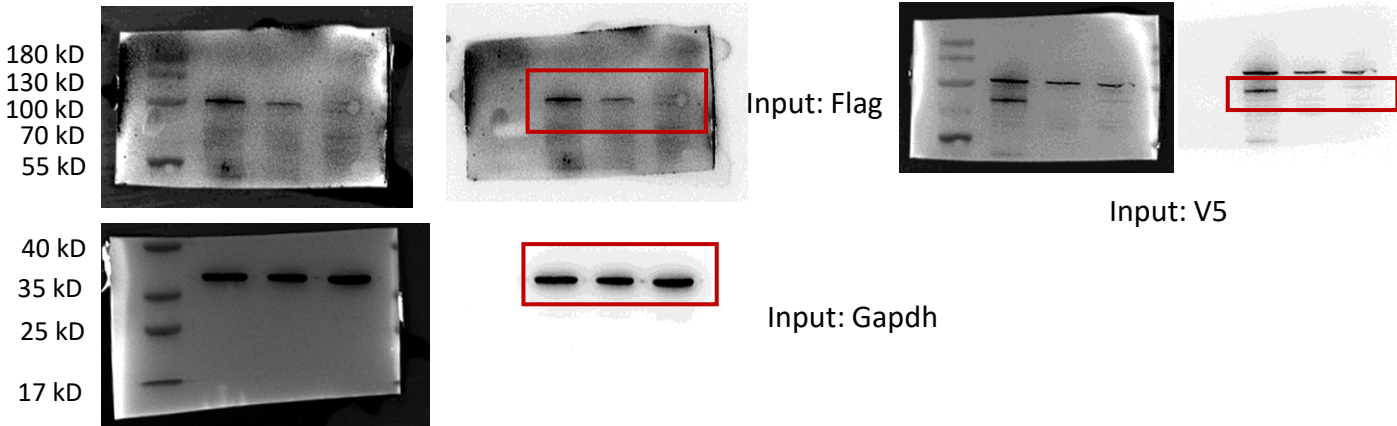

Input: Flag

Input: V5

Input: Gapdh

Fig 5C

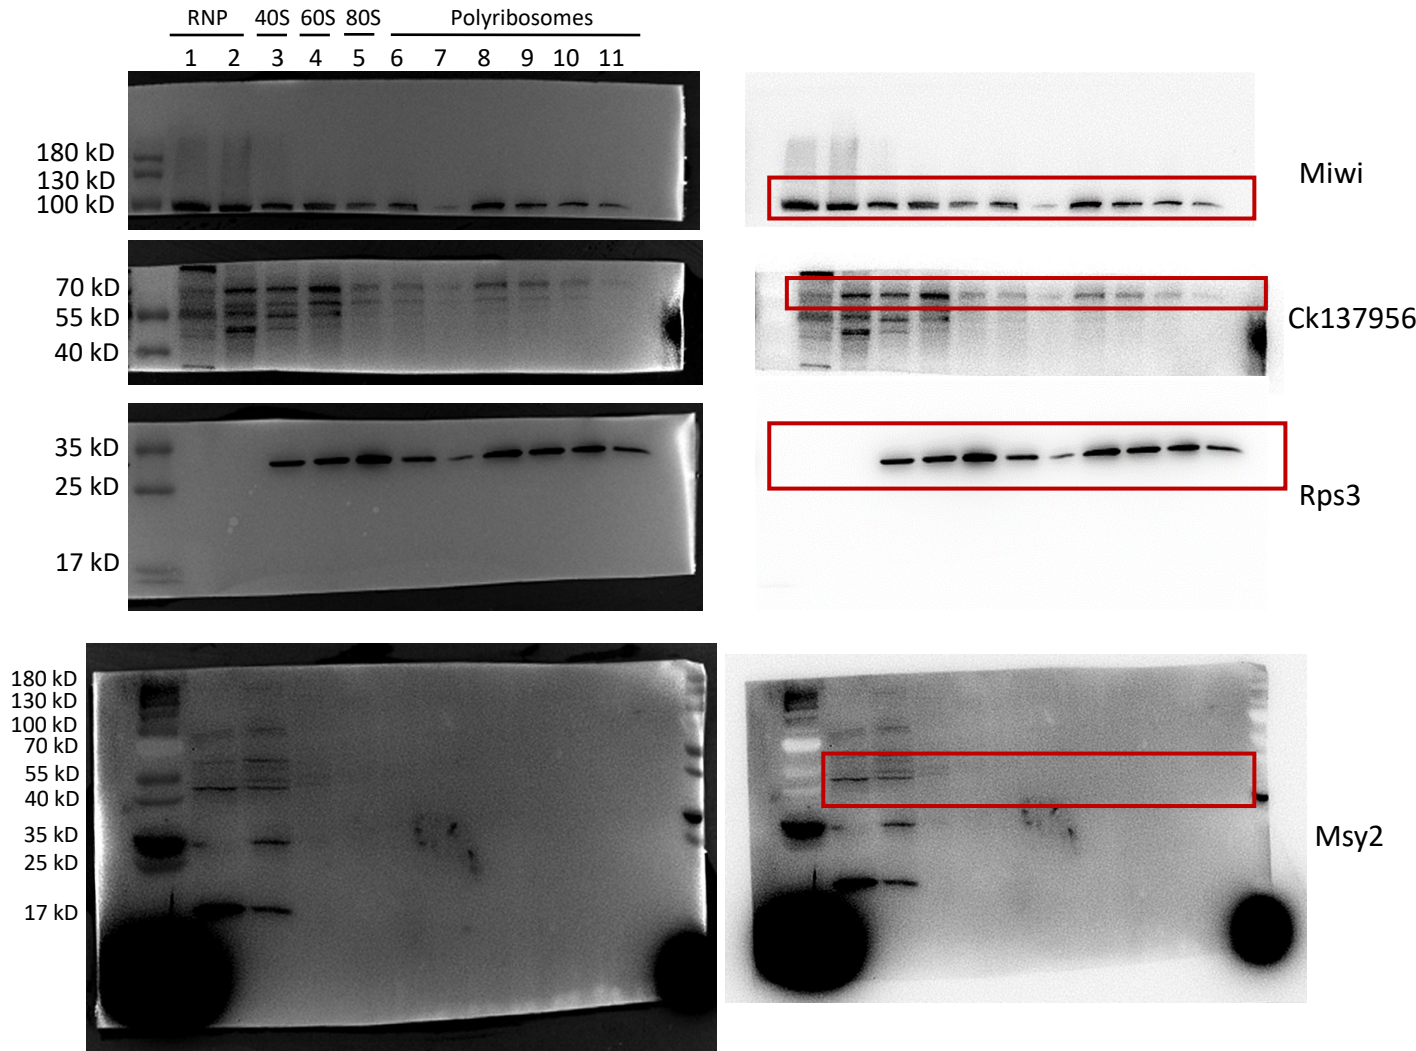

### Additional file 1: Fig S1A

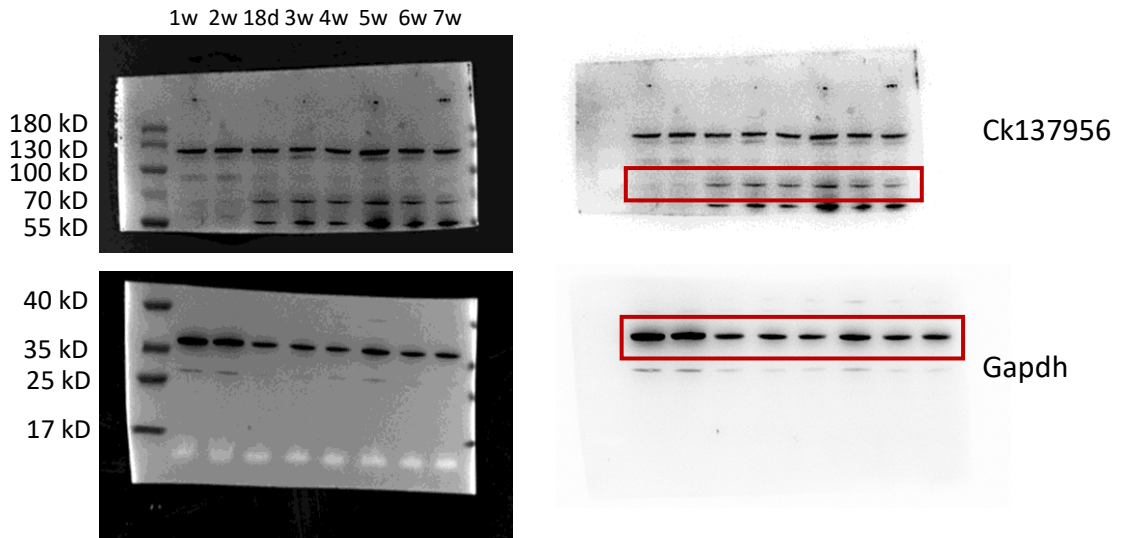

Additional file 1: Fig S3D

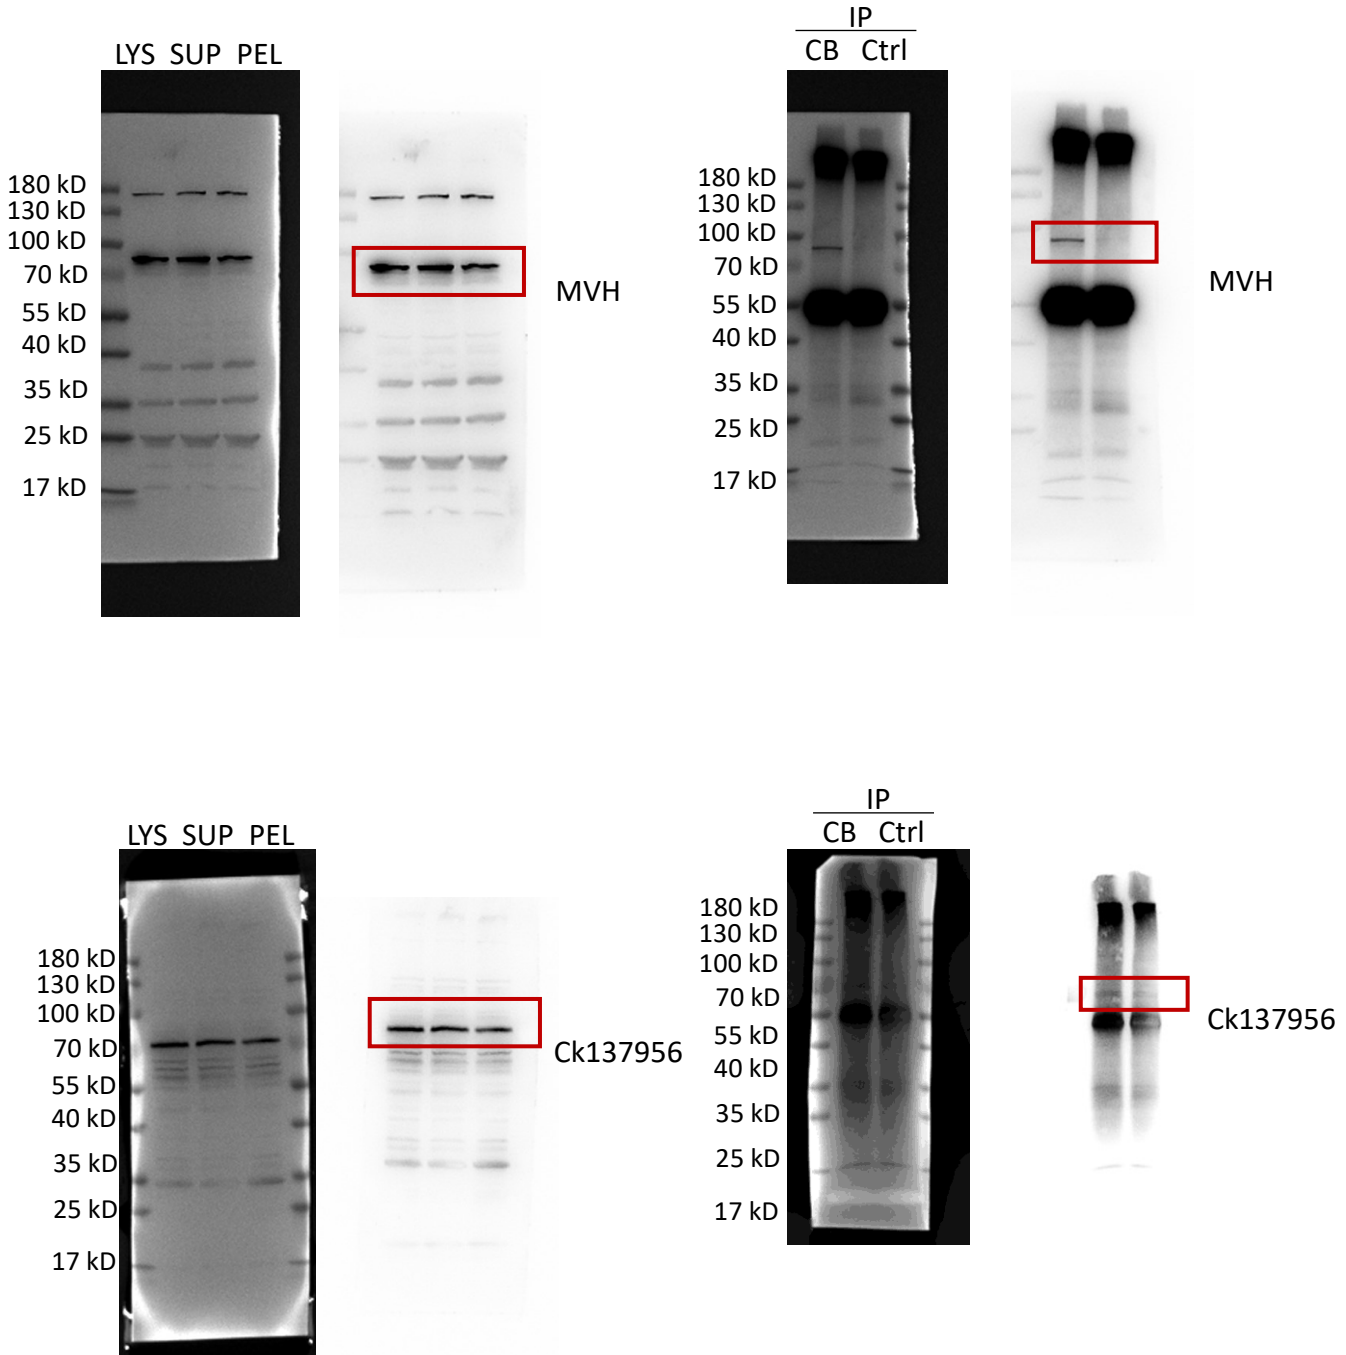

Additional file 1: Fig S4B

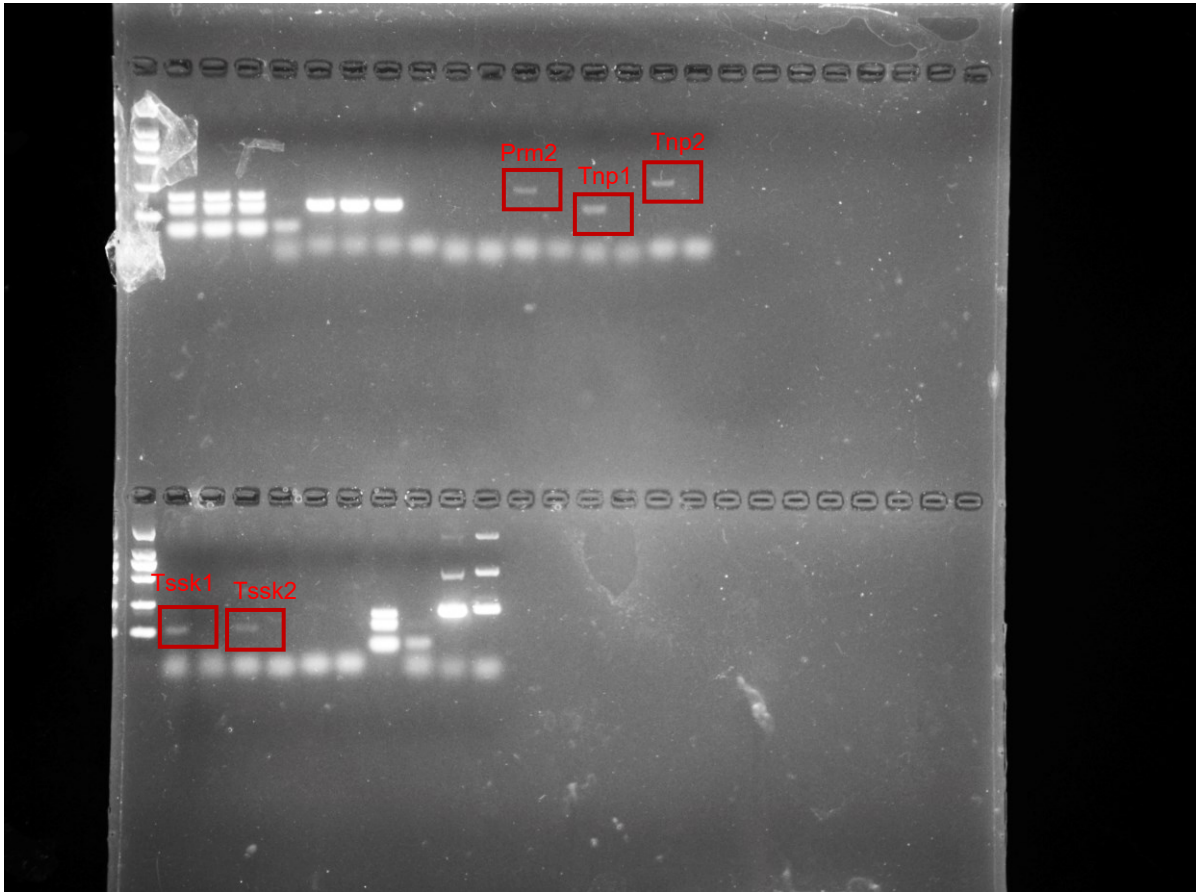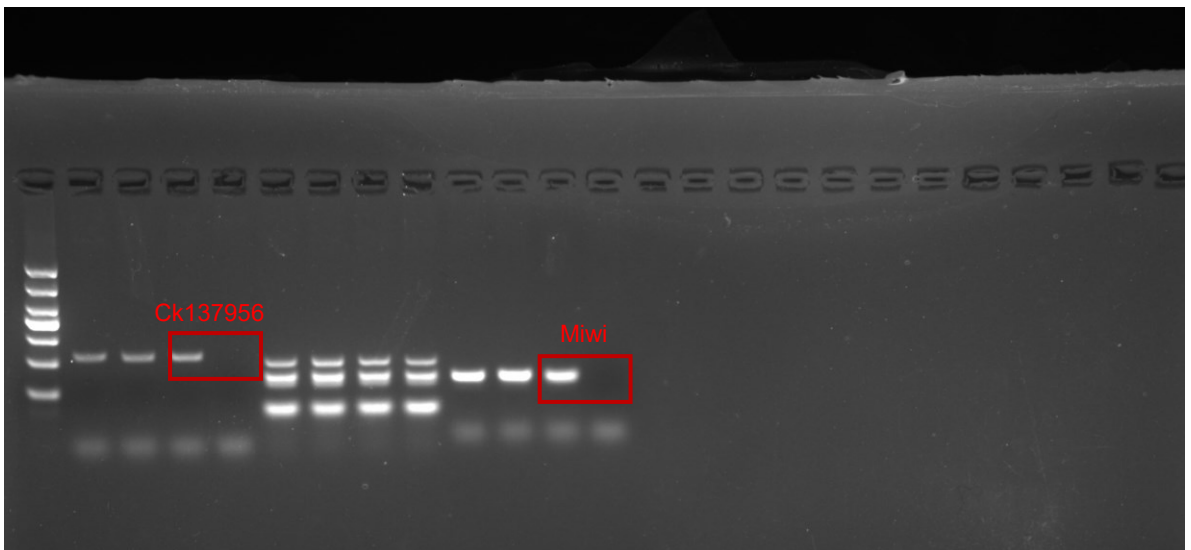

Supplement: 12915_2023_1589_MOESM8_ESM.pdf [file 12915_2023_1589_MOESM8_ESM.pdf]
