# Supplementary material for: Regulation of Miwi-mediated mRNA stabilization by Ck137956/Tssa is essential for male fertility
Source: Springer Nature journal article supplement (doi:10.1186/s12915-023-01589-z), 2023-04-17
Supplement: 12915_2023_1589_MOESM2_ESM.pdf [file 12915_2023_1589_MOESM2_ESM.pdf]

**Table S1. siRNA oligonucleotides**

|                                   | <b>Sequence(5'to3')</b>   |
|-----------------------------------|---------------------------|
| <i>Miwi</i> siRNA                 | 5'-UACUUCUGUGACCUUGUGC-3' |
| <i>Ck137956</i> siRNA (SMARTpool) | 5'-CGUAAUGGCUGGUGACGAG-3' |
|                                   | 5'-GGGAAUGGCAUACGCUUUU-3' |
|                                   | 5'-CCUACGACAGUGCCCGAAA-3' |
|                                   | 5'-CAGCUGAGGCUUCGAACCA-3' |

**Table S2. Gene-specific primers used in qRT-PCR**

| <b>Gene</b>      | <b>Forward primer (5'-3')</b> | <b>Reverse primer (5'-3')</b> |
|------------------|-------------------------------|-------------------------------|
| <i>Ck137956</i>  | GAACCGGAAGGACACCTGTG          | GCACTGTCGTAGGGGAGTTAAA        |
| <i>Miwi</i>      | CAGCAACCTGGGTACATCCC          | CCAAGGTCATGGAAGTCTCGG         |
| <i>Tssk1</i>     | CTCAAGCGACGAGGCTACATC         | ACCGCCACGTTGAACTTTAGG         |
| <i>Tssk2</i>     | GCGGTCCTAAGGAAGAAGGG          | TGACTGCCACATTGAACTTGAG        |
| <i>Prm2</i>      | ACAAGACCATGAACGCGAGG          | GAGGCTTAGTGATGGTGCCT          |
| <i>Tnp1</i>      | ATGTCGACCAGCCGCAAGC           | TCACAAGTGGGATCGGTAAT          |
| <i>Tnp2</i>      | TCGACACTCACCTGCAAGAC          | ATCCTGGAGTGCCTCACTTG          |
| <i>Odf1</i>      | CCGCACTGAGTTGTCTTTTGG         | GGGTGCATGTATAAGTCACACA        |
| <i>Akap4</i>     | GTCAGAAGGCGAGTTAAATCTGG       | ATCCCTCCGTCTTAGACTGGT         |
| <i>Ropn1</i>     | CTGATCATCCACGCAGAT            | ACTTCACACACTATCTTGAG          |
| <i>Prm1</i>      | GCCACAAAATTCCACCTGC           | CAAGATGTGGCGAGATGCTC          |
| <i>Cabs1</i>     | TGTGAACACCACAGATTTGCC         | GAAGAGACCGGAGTTGGTGG          |
| <i>pre-Tnp1</i>  | ATGTCGACCAGCCGCAAGC           | TGTTCCCCTGCTTGCTCAC           |
| <i>pre-Tnp2</i>  | TCGACACTCACCTGCAAGAC          | TTGCAGTGTTCCCTTGTCCTC         |
| <i>pre-Prm2</i>  | ACAAGACCATGAACGCGAGG          | AGATGGGCAGCAGCAGCA            |
| <i>pre-Odf1</i>  | CCGCACTGAGTTGTCTTTTGG         | AGGTCACACCCTCTCCCTTG          |
| <i>pre-Akap4</i> | GTCAGAAGGCGAGTTAAATCTGG       | TTTCCTTACCATCTCTGAACCAGAG     |
| <i>pre-Ropn1</i> | CTGATCATCCACGCAGAT            | CTCTGTCTACCTCGAGCCA           |
| <i>pre-Prm1</i>  | GCCACAAAATTCCACCTGC           | AGACTGCCAGTCCCGCACC           |
| <i>pre-Cabs1</i> | TGTGAACACCACAGATTTGCC         | ACCCCTCGTGTATGTCTATGTGG       |

|                 |                         |                         |
|-----------------|-------------------------|-------------------------|
| <i>Atr</i>      | GAATGGGTGAACAATACTGCTGG | TTTGGTAGCATACTGGCGA     |
| <i>BC026590</i> | AAAGTGGCAAAGCCATTCAAAG  | TCCATCAATCGACCTCTAACACA |
| <i>Gfpt1</i>    | GAAGCCAACGCCTGCAAATC    | CCAACGGGTATGAGCTATTCC   |
| <i>Mdc1</i>     | GTGGCTCCTTGGGGTATAGTG   | GGGCTTCGACCAACTACATTC   |
| <i>Ppp1cb</i>   | GATGTCGTCCAGGAAAGATTGT  | TCAGTGGTGCTTCCAATTCCA   |
| <i>Psm8</i>     | GACAGGGCAATCACCGTCTTC   | CGAGAGCGCAGATTTTCCTCA   |
| <i>Tox4</i>     | TCCCGGAGGAAATGACAATTACC | GTGAGGGATCAGAGTCCAAGG   |

---

**Table S3. piRNA specific primers used in qRT-PCR**

---

| <b>piRNA</b>    | <b>Specific forward primer (5'-3')</b> |
|-----------------|----------------------------------------|
| piR-mmu-1       | TGACATGAACACAGGTGCTCAGATAGCTTT         |
| piR-mmu-17      | TGCAAGGTGTCTTATGGGATTTGAAGTGT          |
| piR-mmu-39      | TGCAAGTGCGCTGACTTCCATTGGCACGAT         |
| piR-mmu-59      | TGCAAGTTGCTGGCTGTCGGATCTTAAA           |
| piR-mmu-232     | AAATGTACAGTGGTGACTACATACTTGC           |
| piR-mmu-1937865 | TATTGTTCTATGTTTTGTTGACTTGCGTTT         |
| piR-mmu-1933172 | TATCTGAAAAGGCTAGGAGGGCTAATCAG          |
| piR-mmu-1930853 | TATAGATACTGTTGCTTAATACTGAGCAC          |
| piR-mmu-1928652 | TATAAAAAGATATGTTTGCTTACCCTGA           |
| piR-mmu-1927772 | TAGTGCCTATGGGGTCTTACACAGAAAG           |

---

**Table S4. Antibodies used in this study**

| <b>Antibodies</b>                                  | <b>Brand</b>      | <b>Cat No.</b> | <b>RRID</b> |
|----------------------------------------------------|-------------------|----------------|-------------|
| anti-Ck137956                                      | Abclonal          | custom-made    | -           |
| anti-PIWIL1                                        | Abcam             | ab12337        | AB_470241   |
| anti-ACTIN                                         | Abways            | AB0033         | -           |
| anti-GAPDH                                         | Abways            | AB0036         | -           |
| anti-H4                                            | Abcam             | ab31830        | AB_1209246  |
| anti-HA                                            | Sigma             | H6908          | AB_260070   |
| anti-DDDDK-Tag                                     | MBL               | PM020          | AB_591224   |
| anti- $\beta$ -TUBULIN                             | Abclonal          | AC021          | AB_2773004  |
| anti-RPS3                                          | Proteintech       | 11990-1-AP     | AB_2180758  |
| anti-MSY2                                          | Proteintech       | 13538-1-AP     | AB_2241777  |
| anti-SYCP3                                         | Proteintech       | 23024-1-AP     | AB_11232426 |
| anti- $\gamma$ H2AX                                | Abcam             | ab26350        | AB_470861   |
| anti-MVH                                           | Proteintech       | 51042-1-AP     | AB_2092998  |
| anti-LINE-1 ORF1p                                  | Novus Biologicals | NBP2-66934     | -           |
| Anti-HDAC1                                         | Santa Cruz        | sc-81598       | AB_2118083  |
| Peanut Agglutinin (PNA), Rhodamine                 | VECTORLABS        | RL-1072        | AB_2336642  |
| Donkey Anti-Mouse IgG H&L (Alexa Fluor® 555)       | Abcam             | ab150106       | AB_2857373  |
| Goat Anti-Rabbit IgG H&L (Alexa Fluor® 555)        | Abcam             | ab150078       | AB_2722519  |
| Goat Anti-Mouse IgG H&L (Alexa Fluor® 488)         | Abcam             | ab150113       | AB_2576208  |
| Goat Anti-Rabbit IgG H&L (Alexa Fluor® 488)        | Abcam             | ab150077       | AB_2630356  |
| Goat anti-Mouse IgG (H+L) Secondary Antibody, HRP  | Invitrogen        | 31430          | AB_228307   |
| Goat anti-Rabbit IgG (H+L) Secondary Antibody, HRP | Invitrogen        | 65-6120        | AB_2533967  |
